# Supplementary material
Source: PubMed Central journal article supplement (PMC7718020)
Supplement: NIHMS1648908-supplement-Supplementary_table1.pdf [file NIHMS1648908-supplement-Supplementary_table1.pdf]

Supplementary table 1 CIED leads for extraction

n=294

| <i>Lead Chamber</i>           |           |
|-------------------------------|-----------|
| Atrial lead, n (%)            | 114 (39%) |
| Right ventricular lead, n (%) | 158 (54%) |
| Left ventricular lead, n (%)  | 20 (7%)   |
| Missing                       | 2         |

| <i>Lead Fixation</i> |           |
|----------------------|-----------|
| Active Fixation      | 205 (77%) |
| Passive Fixation     | 60 (23%)  |
| Missing              | 29        |

| <i>Lead Type</i> |           |
|------------------|-----------|
| Pacing Leads     | 207 (72%) |
| ICD Leads        | 76 (26%)  |
| Epicardial Leads | 5 (2%)    |
| Missing          | 6         |
